# Supplementary material for: Tyrosinase-catalyzed polymerization of l-DOPA (versusl-tyrosine and dopamine) to generate melanin-like biomaterials for immobilization of enzymes and amperometric biosensing
Source: Royal Society of Chemistry journal article supplement (doi:10.1039/c5ra27478h), 2016-01-01
Supplement: c5ra27478h1.pdf [file c5ra27478h1.pdf]

## Electronic Supplementary Information

### **Tyrosinase-catalyzed polymerization of L-DOPA (versus L-tyrosine and dopamine) to generate melanin-like biomaterials for immobilization of enzymes and amperometric biosensing**

Mengzhen Dai<sup>a</sup>, Ting Huang<sup>a</sup>, Long Chao<sup>a</sup>, Yueming Tan<sup>a</sup>, Chao Chen<sup>a,\*</sup>, Wenhua Meng<sup>b</sup>, and Qingji Xie<sup>a,\*</sup>

*<sup>a</sup> Key Laboratory of Chemical Biology and Traditional Chinese Medicine Research (Ministry of Education), National & Local Joint Engineering Laboratory for New Petrochemical Materials and Fine Utilization of Resources, College of Chemistry and Chemical Engineering, Hunan Normal University, Changsha 410081, China*

*<sup>b</sup> Hunan Normal University Hospital, Changsha 410081, China*

---

\* Corresponding author. Tel./Fax: +86 731 88865515.

E-mail: [chenchao840103@163.com](mailto:chenchao840103@163.com) (C. Chen), [xieqj@hunnu.edu.cn](mailto:xieqj@hunnu.edu.cn) (Q. Xie)

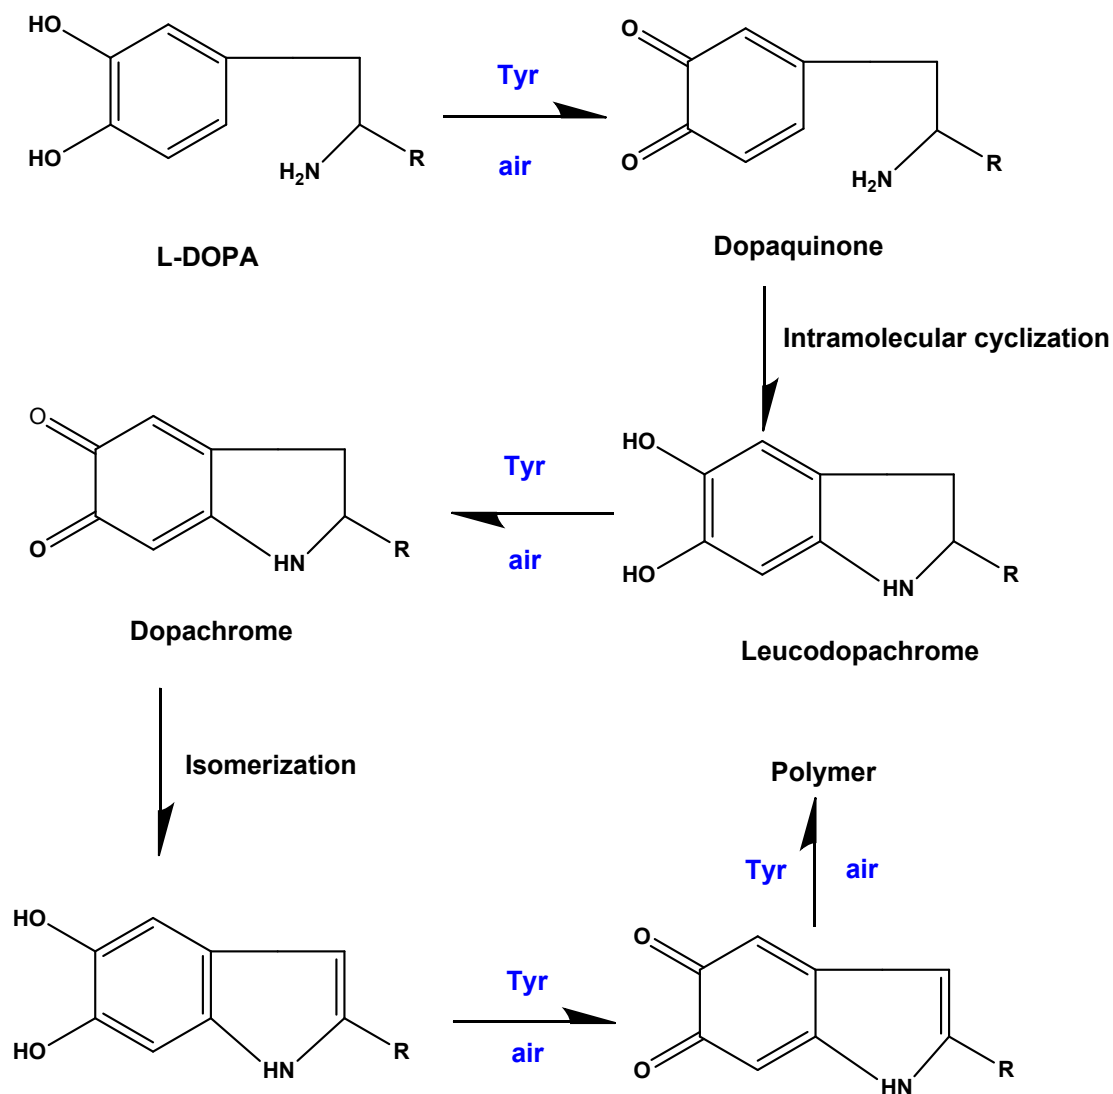

**Scheme S1.** The possible pathways for Tyr-catalyzed oxidation and polymerization of L-DOPA ( $R=\text{COOH}$ ) and DA ( $R=\text{H}$ ). The denominations here are given for L-DOPA only and those for DA can be inferred simply by using the phrase dopamine instead of the phrase dapa, e.g., from dopachromine to dopaminechromine.

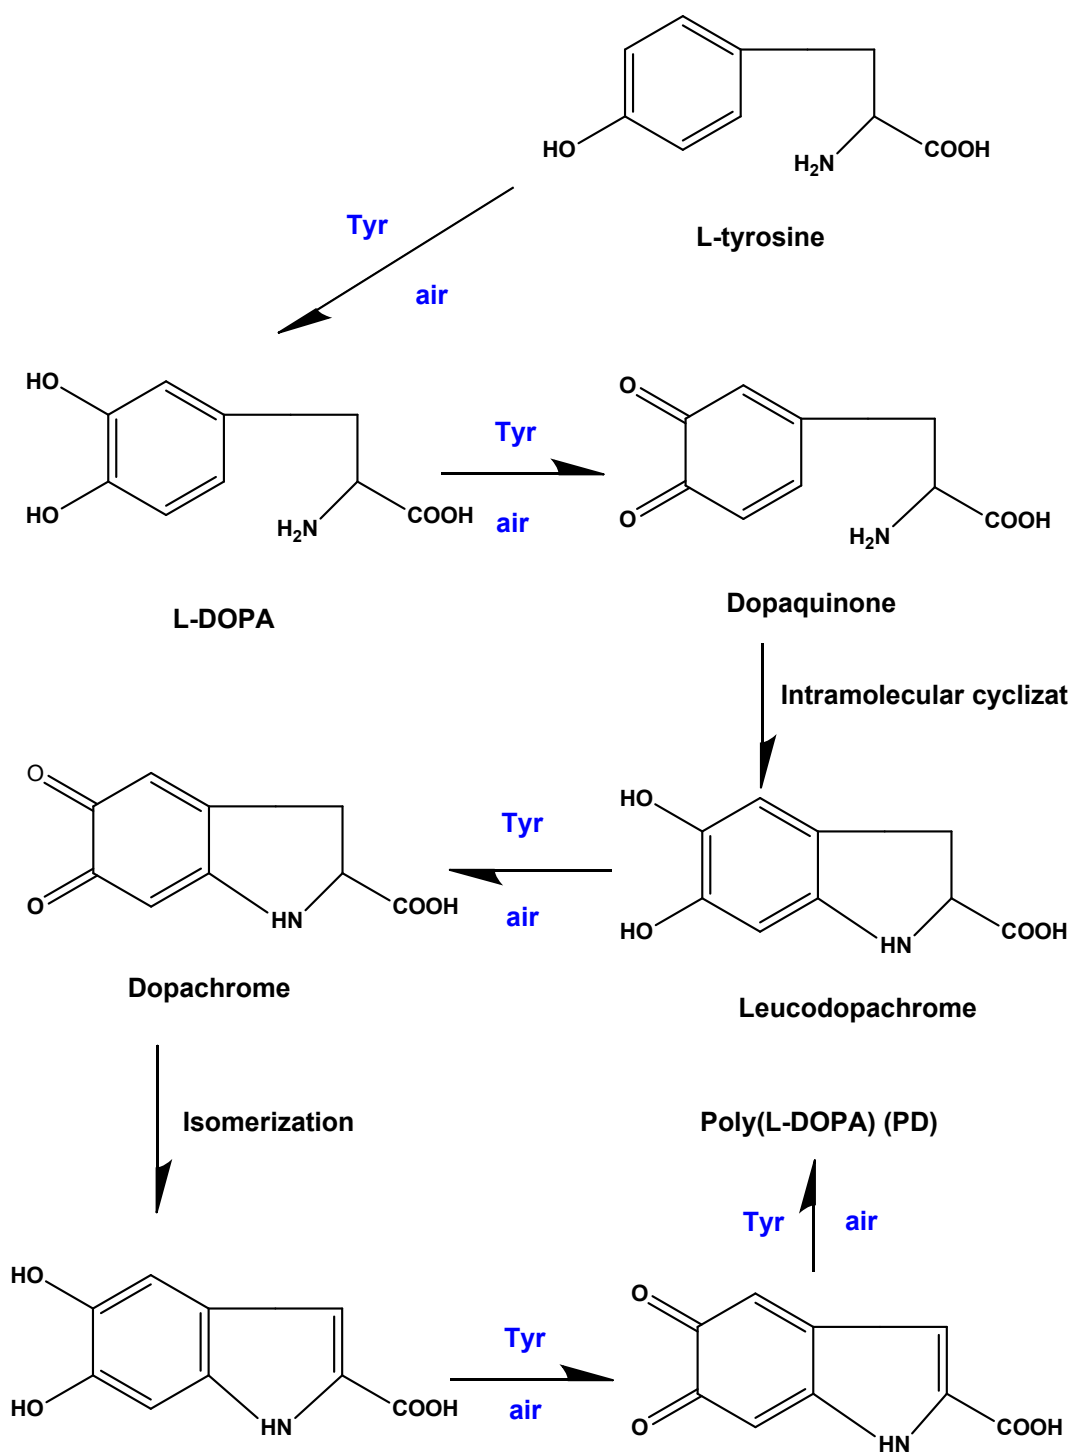

**Scheme S2.** The possible Tyr-catalyzed pathway for oxidation and polymerization of L-tyrosine.

**Table S1.** Catechol-biosensing performance of some enzyme electrodes reported in literatures and developed in this work

| Enzyme electrode                                | $S / \text{mA}$                 | LOD             | LDR             | reference    |
|-------------------------------------------------|---------------------------------|-----------------|-----------------|--------------|
|                                                 | $\text{mM}^{-1} \text{cm}^{-2}$ | $/ \mu\text{M}$ | $/ \mu\text{M}$ |              |
| Tyr-PPy/GCE                                     | 0.0015                          | 2.0             | -               | <sup>1</sup> |
| Tyr/ $\text{Co}_3\text{O}_4$ /GMC               | 6.4                             | 0.025           | 0.05-130        | <sup>2</sup> |
| Tyr-AuNC-(PSS-AuNC) <sub>2</sub> -MPA-AuNP-SPCE | 13.72                           | 0.0004          | 0.01-80         | <sup>3</sup> |
| PD-Tyr-MWCNTs/GCE                               | 4.66                            | 0.04            | 0.4-87          | this work    |
| PD-Tyr-GO/GCE                                   | 3.00                            | 0.03            | 0.4-87          | this work    |
| CS-Tyr/GCE                                      | 2.25                            | 0.04            | 0.4-77          | this work    |
| Nafion-Tyr/GCE                                  | 1.43                            | 0.1             | 0.4-67          | this work    |
| PD <sub>C</sub> -Tyr/GCE                        | 2.86                            | 0.04            | 0.4-87          | this work    |
| PD-Tyr/GCE                                      | 4.29                            | 0.07            | 0.4-57          | this work    |
| poly(L-tyrosine)-Tyr/GCE                        | 1.09                            | 0.08            | 0.4-137         | this work    |
| PDA-Tyr/GCE                                     | 1.75                            | 0.09            | 0.4-117         | this work    |

PPY: polypyrrole; MEBCs: metal-organic coordination polymers-enzyme biocomposites; GMC: graphitized ordered mesoporous carbon; AuNC: gold nanocubes; SPCE: screen printed carbon electrode; PD<sub>C</sub>: chemical oxidative polymerization of L-DOPA by using  $\text{K}_3\text{Fe}(\text{CN})_6$  as an oxidant.

**Table S2.** Performance comparison among some typical glucose biosensors based on immobilized GOx

| Enzyme electrode                     | Sensitivity /<br>$\mu\text{A mM}^{-1} \text{ cm}^{-2}$ | LOD /<br>$\mu\text{M}$ | LDR<br>/ $\mu\text{M}$ | reference |
|--------------------------------------|--------------------------------------------------------|------------------------|------------------------|-----------|
| GOx-PoAP/platinized GCE              | ~57                                                    | 0.5                    | 1-1000                 | 4         |
| CS-GOx-AuNP/Au                       | -                                                      | 2.7                    | 5-2400                 | 5         |
| PDA-GOx/Au                           | 3.81                                                   | 3                      | 50-9000                | 6         |
| Pt/mesoporous carbon-GOx-gelatin/GCE | 8.5                                                    | 1                      | 40-12000               | 7         |
| Au-PtNPs/CNTs/GOx/CS/GCE             | 122                                                    | 0.2                    | 1-7000                 | 8         |
| MWCNTs-CS-GOx/Au                     | 6.7                                                    | 2                      | 5-8000                 | 9         |
| CS-Fc/MWCNTs/GOx/GCE                 | 21.9                                                   | 6.5                    | 20-5360                | 10        |
| PDA-GOx-Lac-MWCNTs /Pt               | 68.6                                                   | 0.5                    | 10-3700                | 11        |
| PD-GOx-Tyr/Pt                        | 78.6                                                   | 0.1                    | 2-5700                 | this work |
| PD-GOx-Tyr-GO/Pt                     | 74.3                                                   | 0.5                    | 2-2700                 | this work |
| PD-GOx-Tyr-MWCNTs /Pt                | 64.3                                                   | 0.5                    | 2-3700                 | this work |
| poly(L-tyrosine)-GOx-Tyr/Pt          | 59.1                                                   | 1                      | 2-5700                 | this work |
| PDA-GOx-Tyr/Pt                       | 45.7                                                   | 1                      | 2-6700                 | this work |

PoAP: poly(*o*-aminophenol); PPY: polypyrrole; PtNPs: Pt nanoparticles; CNTs: carbon nanotubes.

**Table S3.** Results obtained in analysis of several human serum samples with the PD-GOx-Tyr/Pt electrode\*

|   | Determined by<br>biosensor (mM) | Determined in hospital<br>(mM) | Bias (mM) | Standard added<br>(mM) | Found (mM) | Recovery |
|---|---------------------------------|--------------------------------|-----------|------------------------|------------|----------|
| 1 | 4.97                            | 4.88                           | +0.09     | 5.00                   | 4.60       | 92.0     |
| 2 | 4.41                            | 4.45                           | -0.04     | 5.00                   | 5.25       | 105      |
| 3 | 4.39                            | 4.28                           | +0.11     | 5.00                   | 5.20       | 104      |
| 4 | 4.29                            | 4.2                            | +0.09     | 5.00                   | 4.92       | 98.4     |
| 5 | 4.83                            | 4.77                           | +0.06     | 5.00                   | 4.80       | 96.0     |

\* Fresh serum samples were first analyzed at Hunan Normal University Hospital with a Biochemical Analyzer (Mindray BS-300, Shenzhen Mindray Biomedical electronics Co., Ltd.) based on the well-known GOx-peroxidase spectrophotometric method. The samples were then analyzed at the PD-GOx-Tyr/Pt electrode. Serum sample (0.100 mL) was added into 10.0 mL PBS at pH 7.0, and the current response was recorded at 0.50 V vs. SCE for glucose analysis.

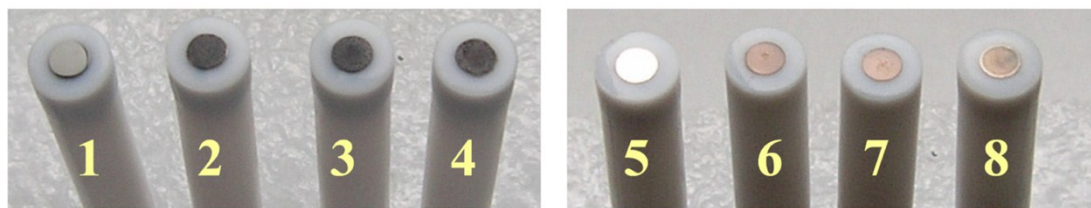

**Fig. S1.** Digital pictures of the surfaces of bare GCE (1), PD-Tyr/GCE (2), PDA-Tyr/GCE (3), and poly(L-tyrosine)-Tyr/GCE (4) (left) as well as bare Pt (5), PD-Tyr/Pt (6), PDA-Tyr/Pt (7), and poly(L-tyrosine)-Tyr/Pt (8) (right) after water rinse and air drying.

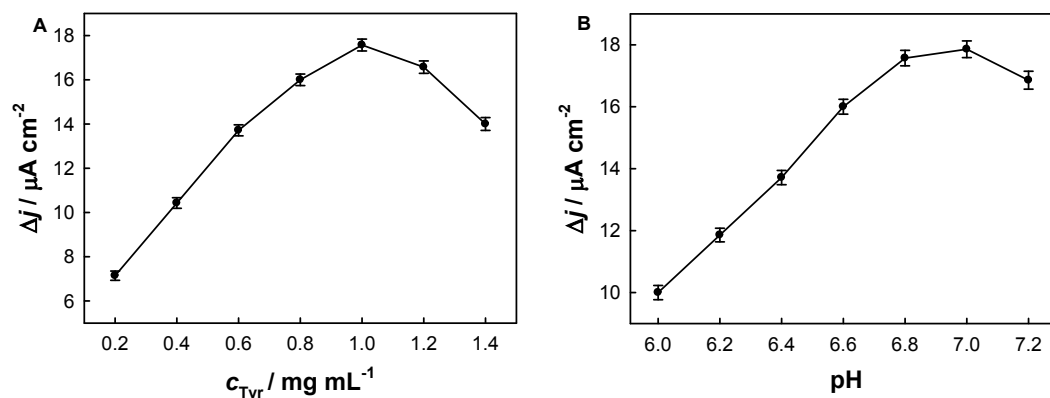

**Fig. S2.** Optimization of Tyr concentration and biosensing solution pH on the stable current response at PD-Tyr/GCE in stirred PBS containing 0.004 mM catechol. Applied potential: -0.1 V vs. SCE. The responses here are discussed as follows. The current response notably increased with the increase of Tyr concentration from 0.2 to 1.0  $\text{mg mL}^{-1}$ , then decreased slightly with the further increase of Tyr concentration to 1.4  $\text{mg mL}^{-1}$ , so 1.0  $\text{mg mL}^{-1}$  Tyr was used in subsequent experiments. In addition, the maximum response of the biosensor occurred at pH 7.0 that fits the enzyme activity, so 0.1 M PBS with pH 7.0 was selected for future experiments.

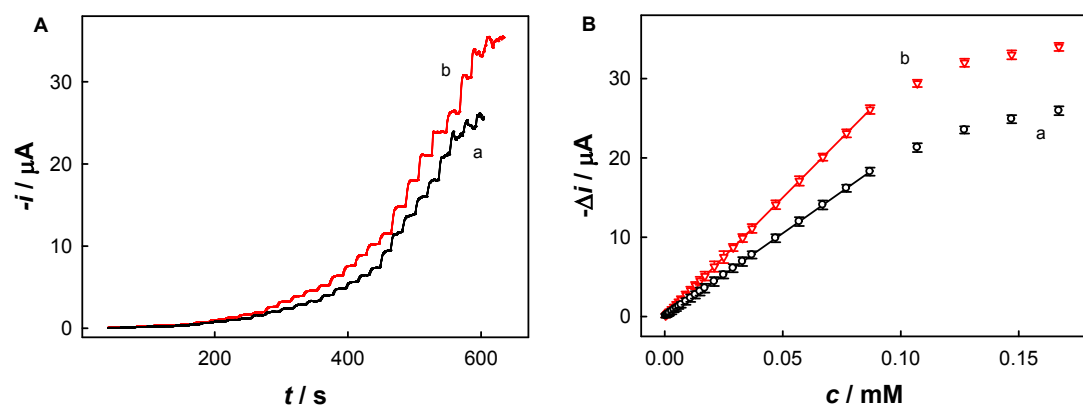

**Fig. S3.** Time-dependent current response (A) to successive additions of catechol into stirred 0.1 M PBS (pH 7.0) under air atmosphere and the calibration curves (B) at PD-Tyr-GO/GCE (a), PD-Tyr-MWCNTs/GCE (b). Applied potential: -0.1 V vs. SCE.

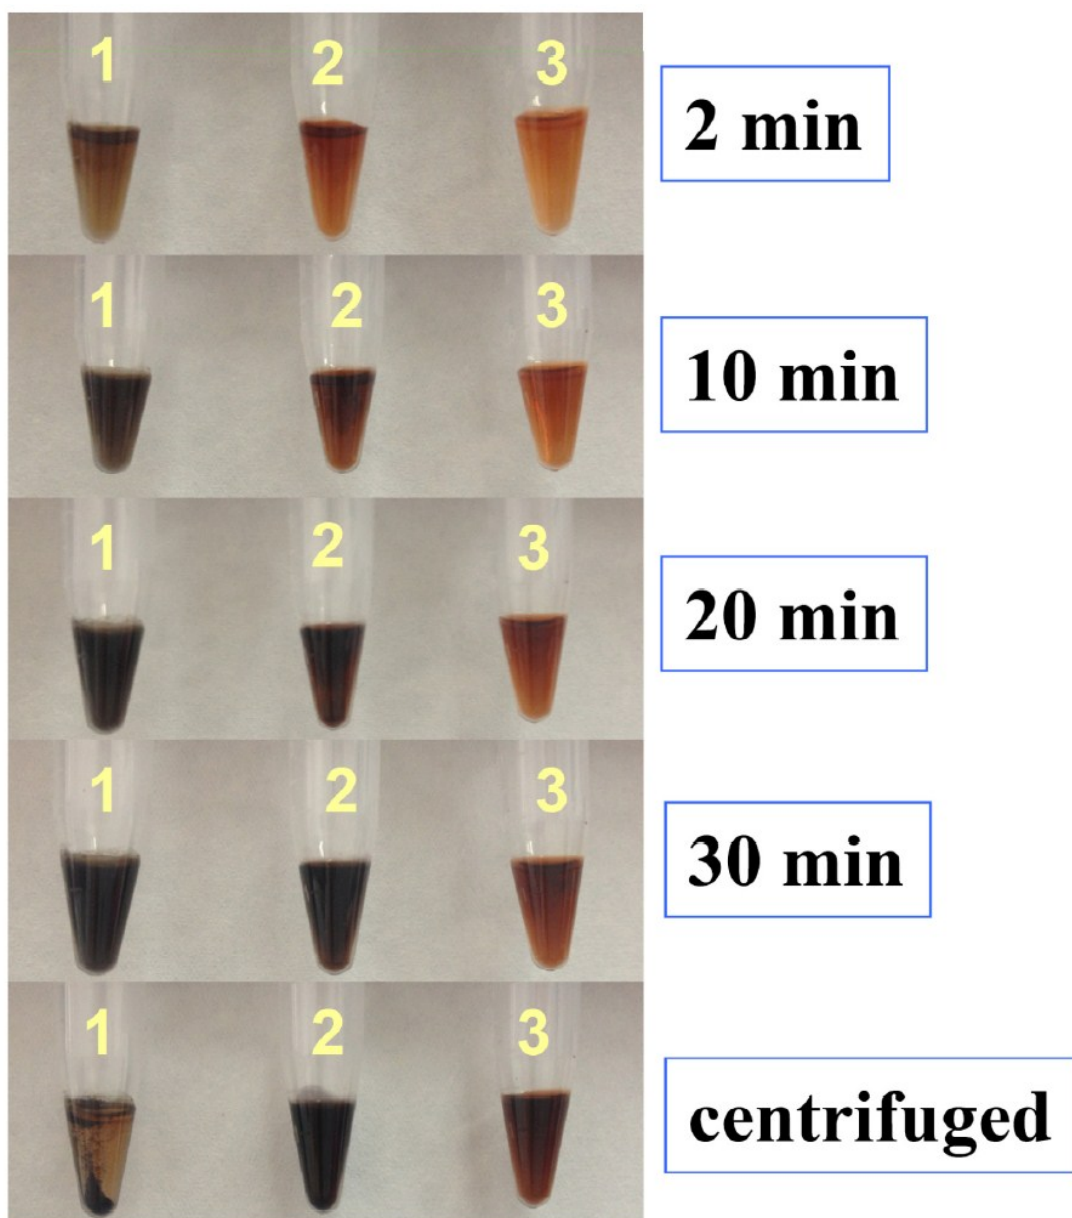

**Fig. S4.** The digital pictures of 5 mM L-DOPA + 1 mg mL<sup>-1</sup> Tyr (1), 5 mM DA + 1 mg mL<sup>-1</sup> Tyr (2), and 5 mM L-tyrosine + 1 mg mL<sup>-1</sup> Tyr (3) after reactions for various time periods (2, 10, 20 or 30 min) and finally a centrifugation immediately after the 30-min reactions.

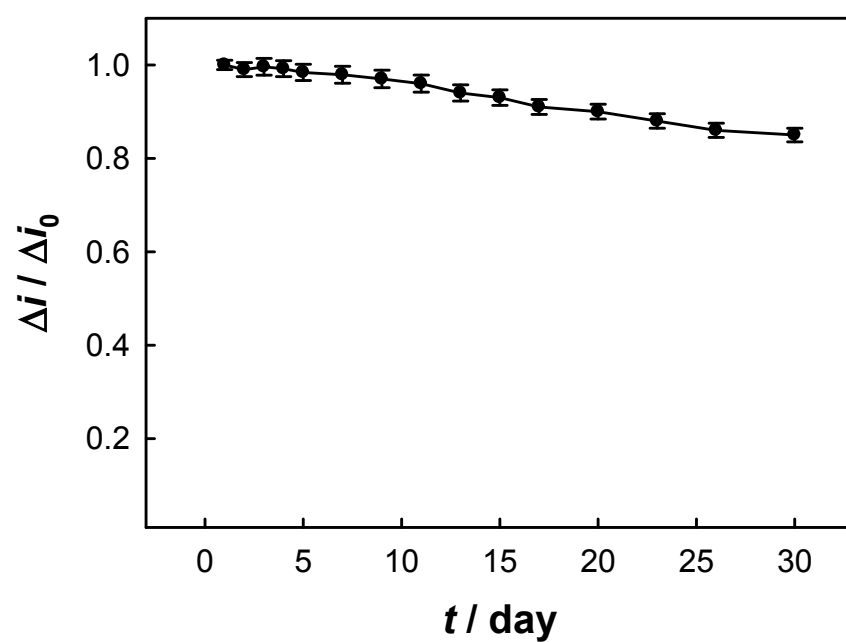

**Fig. S5.** The storage stability of PD-Tyr/GCE under storage condition (as a dry state in a refrigerator at 4 °C).

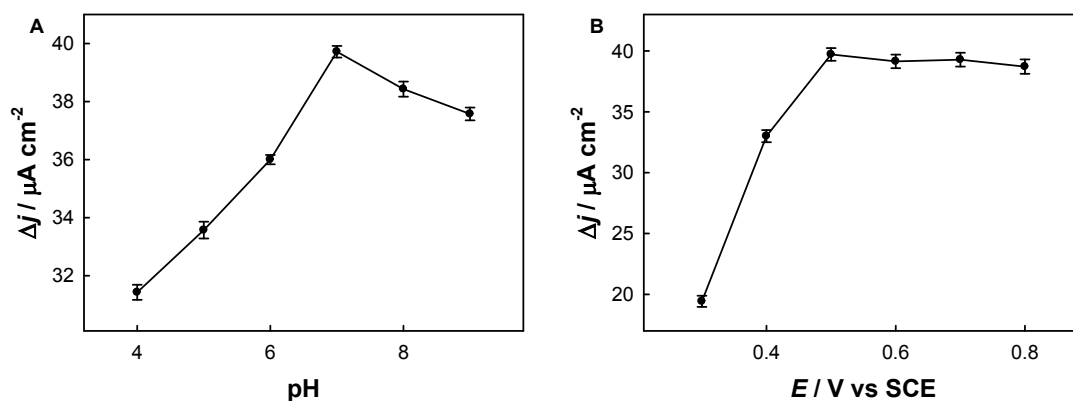

**Fig. S6.** Effects of solution pH (applied potential: 0.5 V vs. SCE) and applied potential (solution pH 7.0) on the stable current density response at PD-GOx-Tyr/Pt in stirred PBS containing 0.5 mM glucose. The responses here are discussed as follows. The maximum response of the biosensor occurred at pH 7.0 that fits the enzyme activity, so 0.1 M PBS with pH 7.0 was selected for future experiments.  $\Delta j$  increased rapidly with the change of applied potential from 0.30 to 0.50 V vs. SCE and then increased slowly from 0.50 to 0.8 V vs. SCE, due to the increased driving force for the fast oxidation of  $H_2O_2$  at the higher potential. To minimize interferences and current noise at high potentials, 0.50 V vs. SCE was selected as the applied potential for amperometric measurement.

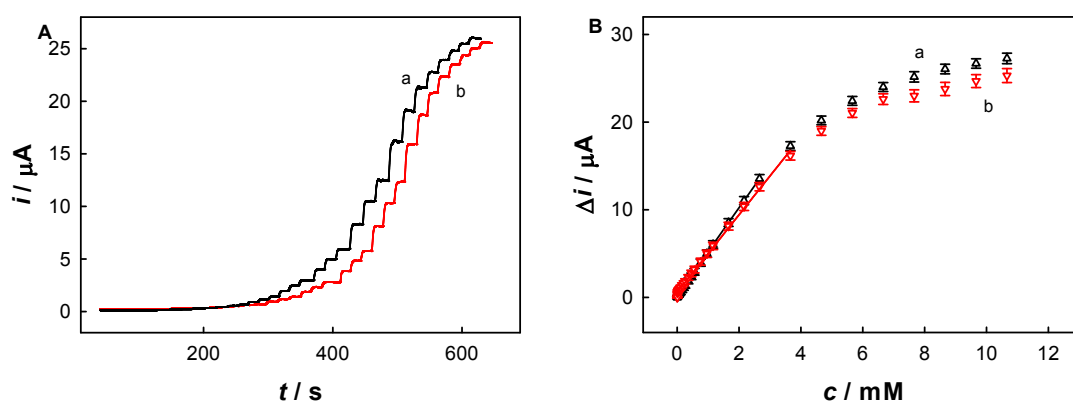

**Fig. S7.** Time-dependent current responses (A) to successive additions of glucose into stirred 0.1 M PBS (pH 7.0) and the calibration curves (B) at PD-GOx-Tyr-GO/Pt (a) and PD-GOx-Tyr-MWCNTs/Pt (b) electrodes. Applied potential: 0.50 V vs. SCE.

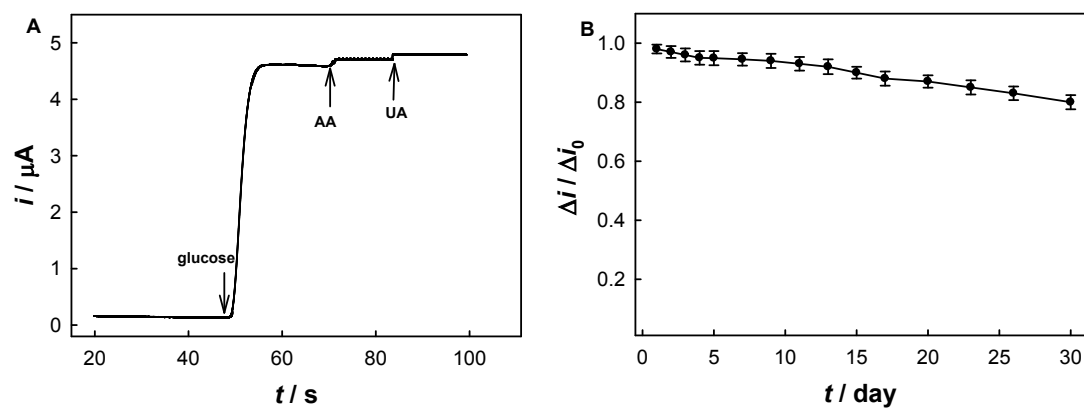

**Fig. S8.** (A) Amperometric response obtained at PD-GOx-Ty/Pt electrode in PBS (pH 7.0). The arrows show the moments of injections of 1 mM glucose, 0.2 mM ascorbic acid (AA), and 0.2 mM uric acid (UA). Applied potential: 0.5 V vs. SCE. The addition of AA or UA only yielded within 4% of the glucose response here. (B) The storage stability of PD-GOx-Tyr/Pt electrode under storage conditions (as a dry state in a refrigerator at 4 °C).

**References** (The numbering here is only for the Electronic Supplementary Information)

- 1 E. Burestedt, A. Narvaez, T. Ruzgas, L. Gorton, J. Emnéus, E. Domínguez and G. Marko-Varga, *Anal. Chem.*, 1996, **68**, 1605-1611.
- 2 X. Wang, X. B. Lu, L. D. Wu and J. P. Chen, *ChemElectroChem*, 2014, **1**, 808-816.
- 3 M. N. Karim, J. E. Lee and H. J. Lee, *Biosens. Bioelectron.*, 2014, **61**, 147-151.
- 4 Z. Zhang, H. Liu and J. Deng, *Anal. Chem.*, 1996, **68**, 1632-1638.
- 5 J. Li and X. Lin, *Biosens. Bioelectron.*, 2007, **22**, 2898-2905.
- 6 M. R. Li, C. Y. Deng, Q. J. Xie, Y. Yang and S. Z. Yao, *Electrochim. Acta*, 2006, **51**, 5478-5486.
- 7 J. J. Yu, D. L. Yu, T. Zhao and B. Z. Zeng, *Talanta*, 2008, **74**, 1586-1591.
- 8 X. H. Kang, Z. B. Mai, X. Y. Zou, P. X. Cai and J. Y. Mo, *Anal. Biochem.*, 2007, **369**, 71-79.
- 9 Q. M. Zhou, Q. J. Xie, Y. C. Fu, Z. H. Su, X. Jia and S. Z. Yao, *J. Phys. Chem. B*, 2007, **111**, 11276-11284.
- 10 X. Zeng, X. Li, L. Xing, X. Liu, S. Luo, W. Wei, B. Kong and Y. Li, *Biosens. Bioelectron.*, 2009, **24**, 2898-2903.
- 11 Y. M. Tan, W. F. Deng, Y. Y. Li, Z. Huang, Y. Meng, Q. J. Xie, M. Ma and S. Z. Yao, *J. Phys. Chem. B*, 2010, **114**, 5016-5024.
